# Supplementary material for: Auranofin prevents liver fibrosis by system Xc-mediated inhibition of NLRP3 inflammasome
Source: PubMed Central journal article supplement (PMC8245406; doi:10.1038/s42003-021-02345-1), 2021-06-30
Supplement: 42003_2021_2345_MOESM2_ESM.pdf [file 42003_2021_2345_MOESM2_ESM.pdf]

### **Description of Additional Supplementary Files**

File Name: Supplementary Data 1

Description: data sets and exact pvalues for the graphs presented in the main figures.
