# Supplementary material for: Auranofin prevents liver fibrosis by system Xc-mediated inhibition of NLRP3 inflammasome
Source: PubMed Central journal article supplement (PMC8245406; doi:10.1038/s42003-021-02345-1), 2021-06-30
Supplement: 42003_2021_2345_MOESM4_ESM.pdf [file 42003_2021_2345_MOESM4_ESM.pdf]

## Reporting Summary

Nature Research wishes to improve the reproducibility of the work that we publish. This form provides structure for consistency and transparency in reporting. For further information on Nature Research policies, see our [Editorial Policies](#) and the [Editorial Policy Checklist](#).

### Statistics

For all statistical analyses, confirm that the following items are present in the figure legend, table legend, main text, or Methods section.

n/a Confirmed

- The exact sample size ( $n$ ) for each experimental group/condition, given as a discrete number and unit of measurement
- A statement on whether measurements were taken from distinct samples or whether the same sample was measured repeatedly
- The statistical test(s) used AND whether they are one- or two-sided  
*Only common tests should be described solely by name; describe more complex techniques in the Methods section.*
- A description of all covariates tested
- A description of any assumptions or corrections, such as tests of normality and adjustment for multiple comparisons
- A full description of the statistical parameters including central tendency (e.g. means) or other basic estimates (e.g. regression coefficient) AND variation (e.g. standard deviation) or associated estimates of uncertainty (e.g. confidence intervals)
- For null hypothesis testing, the test statistic (e.g.  $F$ ,  $t$ ,  $r$ ) with confidence intervals, effect sizes, degrees of freedom and  $P$  value noted  
*Give  $P$  values as exact values whenever suitable.*
- For Bayesian analysis, information on the choice of priors and Markov chain Monte Carlo settings
- For hierarchical and complex designs, identification of the appropriate level for tests and full reporting of outcomes
- Estimates of effect sizes (e.g. Cohen's  $d$ , Pearson's  $r$ ), indicating how they were calculated

*Our web collection on [statistics for biologists](#) contains articles on many of the points above.*

### Software and code

Policy information about [availability of computer code](#)

Data collection

Data analysis

For manuscripts utilizing custom algorithms or software that are central to the research but not yet described in published literature, software must be made available to editors and reviewers. We strongly encourage code deposition in a community repository (e.g. GitHub). See the Nature Research [guidelines for submitting code & software](#) for further information.

### Data

Policy information about [availability of data](#)

All manuscripts must include a [data availability statement](#). This statement should provide the following information, where applicable:

- Accession codes, unique identifiers, or web links for publicly available datasets
- A list of figures that have associated raw data
- A description of any restrictions on data availability

# Life sciences study design

All studies must disclose on these points even when the disclosure is negative.

|                 |                                                                                                                                                     |
|-----------------|-----------------------------------------------------------------------------------------------------------------------------------------------------|
| Sample size     | In vitro assays (e.g. Western blot, ELISA, cystine uptake assay) were repeated at least three times.                                                |
| Data exclusions | N/A                                                                                                                                                 |
| Replication     | All attempts at replication were successful.                                                                                                        |
| Randomization   | N/A                                                                                                                                                 |
| Blinding        | For the measurement of fibrosis score in animal experiments, we masked the name of the samples and the quantifications were performed by an expert. |

## Reporting for specific materials, systems and methods

We require information from authors about some types of materials, experimental systems and methods used in many studies. Here, indicate whether each material, system or method listed is relevant to your study. If you are not sure if a list item applies to your research, read the appropriate section before selecting a response.

### Materials & experimental systems

### Methods

| n/a                                 | Involved in the study                                           |
|-------------------------------------|-----------------------------------------------------------------|
| <input type="checkbox"/>            | <input checked="" type="checkbox"/> Antibodies                  |
| <input type="checkbox"/>            | <input checked="" type="checkbox"/> Eukaryotic cell lines       |
| <input checked="" type="checkbox"/> | <input type="checkbox"/> Palaeontology and archaeology          |
| <input type="checkbox"/>            | <input checked="" type="checkbox"/> Animals and other organisms |
| <input checked="" type="checkbox"/> | <input type="checkbox"/> Human research participants            |
| <input checked="" type="checkbox"/> | <input type="checkbox"/> Clinical data                          |
| <input checked="" type="checkbox"/> | <input type="checkbox"/> Dual use research of concern           |

| n/a                                 | Involved in the study                              |
|-------------------------------------|----------------------------------------------------|
| <input checked="" type="checkbox"/> | <input type="checkbox"/> ChIP-seq                  |
| <input type="checkbox"/>            | <input checked="" type="checkbox"/> Flow cytometry |
| <input checked="" type="checkbox"/> | <input type="checkbox"/> MRI-based neuroimaging    |

## Antibodies

### Antibodies used

Antibody name (Species, Applications, Cat. NO., LOT. NO., Clone name/number, Company)  
 [Primary antibody]  
 anti-aSMA (rabbit, WB, ab32575,-,-, Abcam)  
 anti-aSMA (mouse, IF, A5228,-,-, Sigma)  
 anti-NOS2 (rabbit, WB, sc-650,-,-, Santa cruz)  
 anti-COX2 (rabbit, WB, 4842S,-,-, Cell Signaling Technology)  
 anti-GAPDH (mouse, WB, CB1001,-,-, Millipore)  
 anti-NLRP3 (rabbit, WB, AG-20B-0014-C100,-,-, Adipogen)  
 anti-IL1b (rabbit, WB, ab9722,-,-, Abcam)  
 anti-caspase1 (mouse, WB, sc-56036,-,-, Santa Cruz)  
 anti-caspase-1, cleaved (mouse, WB, AG-20B-0042-C100,-,-, Adipogen)  
 anti-ASC (rabbit, WB, AG-25B-0006-C100,-,-, Adipogen)  
 anti-ASC (mouse, IF, sc-271054,-,-, Santa Cruz)  
 anti-GSDMDC1 (mouse, WB, sc-393656,-,-, Santa Cruz)  
 anti-HMGB1 (rabbit, WB, 3935S,-,-, Cell Signaling Technology)  
 anti-caspase-3 (rabbit, WB, 9662S,-,-, Cell Signaling Technology)  
 anti-caspase-3, cleaved (rabbit, WB, 9664S,-,-, Cell Signaling Technology)  
 anti-psmad3 (rabbit, WB, 9520S,-,-, Cell Signaling Technology)  
 anti-smad3 (rabbit, WB, 9523S,-,-, Cell Signaling Technology)  
 anti-psmad2 (rabbit, WB, 3108S,-,-, Cell Signaling Technology)  
 anti-smad2 (rabbit, WB, 5339S,-,-, Cell Signaling Technology)  
 anti-TrxR2 (mouse, WB, sc-376868,-,-, Santa Cruz)  
 anti-Trx2 (rabbit, WB, sc-50336,-,-, Santa Cruz)  
 anti-TrxR1 (mouse, WB, sc-28321,-,-, Santa Cruz)  
 anti-Trx1 (rabbit, WB, 2429S,-,-, Cell Signaling Technology)  
 anti-xCT (rabbit, WB/IF/IHC, NB300-318,-,-, Novus)  
 anti-CD44 (rabbit, WB/IF, ab157107,-,-, Abcam)  
 anti-CBS (mouse, WB, sc-133154,-,-, Santa Cruz)  
 anti-CTH (mouse, H00001491-M01, -, -, Abnova)  
 anti-F4/80 (mouse, IHC, sc-377009,-,-, Santa Cruz)

## Validation

[Secondary antibody]

Anti-mouse IgG, HRP-linked Antibody (mouse, WB, 7076S,-,-, Cell Signaling Technology)

Anti-rabbit IgG, HRP-linked Antibody (rabbit, WB, 7074S,-,-, Cell Signaling Technology)

Format:

Antibody name (Species, Applications, Cat. NO., LOT. NO., Clone name/number, Company)

[Primary antibody]

anti-aSMA (rabbit, WB, ab32575,-,-, Abcam)

Species reactivity: Mouse, Rat

Application: WB, IHC-P, Flow Cyt, ICC/IF

Citation: PMID 31746423, PMID 31704583

anti-aSMA (mouse, IF, A5228,-,-, Sigma)

Species reactivity: Mouse, Human, Sheep, Chicken, Goat, Bovine, Rat, Guinea pig, Canine, Rabbit, Snake

Application: WB, IHC, ICC/IF, Microarray

Citation: PMID 21681858

anti-NOS2 (rabbit, WB, sc-650,-,-, Santa cruz)

Species reactivity: Mouse, Rat

Application: WB, IP, IF

Citation: PMID 27239349, PMID 26838169

anti-GAPDH (mouse, WB, CB1001,-,-, Millipore)

Species reactivity: Canine, Chicken, Fish, Frog, Human, Mouse, Porcine, Rabbit

Application: ELISA, WB, IHC

Citation: PMID 16005468

anti-NLRP3 (rabbit, WB, AG-20B-0014-C100,-,-, Adipogen)

Species reactivity: Human, Mouse

Application: WB, IF, IP, IHC, ChIP

Citation: PMID 21994456

anti-IL1b (rabbit, WB, ab9722,-,-, Abcam)

Species reactivity: Recombinant fragment

Application: Sandwich ELISA, WB

Citation: PMID 31539804, PMID 31931832

anti-caspase1 (mouse, WB, sc-56036,-,-, Santa Cruz)

Species reactivity: Human, Mouse, Rat

Application: WB, IP, IF

Citation: PMID 31432144, PMID 31327667

anti-caspase-1, cleaved (mouse, WB, AG-20B-0042-C100,-,-, Adipogen)

Species reactivity: Mouse

Application: WB, IHC, IP

Citation: PMID: 22444631 PMID: 23809162

anti-ASC (rabbit, WB, AG-25B-0006-C100,-,-, Adipogen)

Species reactivity: Mouse, Human

Application: WB, IHC, IP

Citation: PMID 24952504

anti-ASC (mouse, IF, sc-271054,-,-, Santa Cruz)

Species reactivity: Mouse, Human, Rat

Application: WB, IHC, IP, IF, Solid Phase ELISA

Citation: PMID 23209696

anti-GSDMDC1 (mouse, WB, sc-393656,-,-, Santa Cruz)

Species reactivity: Mouse, Rat

Application: WB, IF, IP, WB, Solid Phase ELISA

Citation: PMID 31097341, PMID 31145977

anti-HMGB1 (rabbit, WB, 3935S,-,-, Cell Signaling Technology)

Species reactivity: Mouse, Human, Rat, Monkey

Application: WB, IF

Citation: PMID 31545489

anti-caspase-3 (rabbit, WB, 9662S,-,-, Cell Signaling Technology)

Species reactivity: Mouse, Human, Rat, Monkey

Application: WB, IP, IHC  
Citation: PMID 31971852

anti-caspase-3, cleaved (rabbit, WB, 9664S,-,-, Cell Signaling Technology)  
Species reactivity: Mouse, Human, Rat, Monkey  
Application: WB, IP, IHC, IF, F  
Citation: PMID 31854220

anti-psmad3 (rabbit, WB, 9520S,-,-, Cell Signaling Technology)  
Species reactivity: Mouse, Human, Rat  
Application: WB, IP, ChIP  
Citation: PMID 32187849

anti-smad3 (rabbit, WB, 9523S,-,-, Cell Signaling Technology)  
Species reactivity: Mouse, Human, Rat, Monkey  
Application: WB, IP, IF, F, ChIP  
Citation: PMID 32477928

anti-psmad2 (rabbit, WB, 3108S,-,-, Cell Signaling Technology)  
Species reactivity: Mouse, Human, Rat, Mink  
Application: WB  
Citation: PMID 32434697

anti-smad2 (rabbit, WB, 5339S,-,-, Cell Signaling Technology)  
Species reactivity: Mouse, Human, Rat, Monkey  
Application: WB, IP, IF, F, ChIP  
Citation: PMID 32269624

anti-TrxR2 (mouse, WB, sc-376868,-,-, Santa Cruz)  
Species reactivity: Mouse, Rat  
Application: WB, IP, IF, IHC, Solid Phase ELISA  
Citation: PMID 31078905

anti-Trx2 (rabbit, WB, sc-50336,-,-, Santa Cruz)  
Species reactivity: Mouse, Rat, Human  
Application: WB, IP, IF, IHC, Solid Phase ELISA  
Citation: PMID 30773462

anti-TrxR1 (mouse, WB, sc-28321,-,-, Santa Cruz)  
Species reactivity: Mouse, Rat, Human  
Application: WB, IP, IF, IHC, Solid Phase ELISA  
Citation: PMID 30799286

anti-Trx1 (rabbit, WB, 2429S,-,-, Cell Signaling Technology)  
Species reactivity: Mouse, Rat, Human  
Application: WB, IHC  
Citation: PMID: 27807255

anti-xCT (rabbit, WB/IF/IHC, NB300-318,-,-, Novus Biologicals)  
Species reactivity: Mouse, Rat, Human  
Application: WB, F, ICC/IF, IHC, IHC-P, Dual ISH-IHCC  
Citation: PMID 31264167

anti-CD44 (rabbit, WB/IF, ab157107,-,-, Abcam)  
Species reactivity: Mouse, Rat, Human  
Application: ICC/IF, WB, IP, IHC-P  
Citation: PMID 32398747

anti-CBS (mouse, WB, sc-133154,-,-, Santa Cruz)  
Species reactivity: Mouse, Rat, Human  
Application: WB, IP, IHC, Solid Phase ELISA  
Citation: PMID 31111947

anti-CTH (mouse, H00001491-M01, -, -, Abnova)  
Species reactivity: Mouse, Guinea pig, Human  
Application: WB, Sandwich ELISA  
Citation: PMID 26047341

anti-F4/80 (mouse, IHC, sc-377009,-,-, Santa Cruz)

Species reactivity: Mouse, Rat, Human

Application: WB, IP, IHC, Solid Phase ELISA

Citation: PMID 25136608

[Secondary antibody]

Anti-mouse IgG, HRP-linked Antibody (mouse, WB, 7076S,-,-, Cell Signaling Technology)

Species reactivity: Mouse

Application: WB

Citation: PMID 23849170

Anti-rabbit IgG, HRP-linked Antibody (rabbit, WB, 7074S,-,-, Cell Signaling Technology)

Species reactivity: Rabbit

Application: WB

Citation: PMID 31324602

## Eukaryotic cell lines

Policy information about [cell lines](#)

|                                                                      |                                                                          |
|----------------------------------------------------------------------|--------------------------------------------------------------------------|
| Cell line source(s)                                                  | LX-2                                                                     |
| Authentication                                                       | LX-2 Cell line was obtained from Scott L. Friedman, M.D. (PMID 21837750) |
| Mycoplasma contamination                                             | LX-2 cell line was tested negative for mycoplasma contamination.         |
| Commonly misidentified lines<br>(See <a href="#">ICLAC</a> register) | N/A                                                                      |

## Animals and other organisms

Policy information about [studies involving animals](#); [ARRIVE guidelines](#) recommended for reporting animal research

|                         |                                                                                                                                 |
|-------------------------|---------------------------------------------------------------------------------------------------------------------------------|
| Laboratory animals      | Mouse, C57BL/6, Male, 8 to 12 weeks old                                                                                         |
| Wild animals            | N/A                                                                                                                             |
| Field-collected samples | N/A                                                                                                                             |
| Ethics oversight        | IACUC (Institutional Animal Care and Use Committee; SNU-171127-2, SNU-181105-6-1 and SNU-140930-5) in Seoul National University |

Note that full information on the approval of the study protocol must also be provided in the manuscript.

## Flow Cytometry

### Plots

Confirm that:

- The axis labels state the marker and fluorochrome used (e.g. CD4-FITC).
- The axis scales are clearly visible. Include numbers along axes only for bottom left plot of group (a 'group' is an analysis of identical markers).
- All plots are contour plots with outliers or pseudocolor plots.
- A numerical value for number of cells or percentage (with statistics) is provided.

### Methodology

|                           |                                                                         |
|---------------------------|-------------------------------------------------------------------------|
| Sample preparation        | Cells were harvested by rubber policeman and washed with PBS            |
| Instrument                | FACS Calibur flow cytometer 2 (BD science, San Jose, CA, USA)           |
| Software                  | BD CellQuest™ Pro Software                                              |
| Cell population abundance | Living cells in PBS were gated by FSC/SSC using CellQuest™ Pro Software |
| Gating strategy           | Cells were gated by FSC/SSC                                             |

- Tick this box to confirm that a figure exemplifying the gating strategy is provided in the Supplementary Information.
